# Supplementary material for: Chemoenzymatic Synthesis of Selegiline: An Imine Reductase-Catalyzed Approach
Source: MDPI journal article supplement (doi:10.3390/molecules29061328), 2024-03-16
Supplement: s1 [file s1]

# Chemoenzymatic Synthesis of Selegiline: An Imine Reductase-Catalyzed Approach

Yuliang Hu <sup>1,2</sup>, Jinping Bao <sup>2</sup>, Dongyu Tang <sup>2</sup>, Shushan Gao <sup>2,3</sup>, Fei Wang <sup>1</sup>,  
Zhongtao Ding <sup>1,2,\*</sup> and Chengsen Cui <sup>2,3,\*</sup>

<sup>1</sup> College of Bioscience and Bioengineering, Jiangxi Agricultural University, Nanchang 330045, China; huyuliang98@163.com (Y.H.)

<sup>2</sup> Tianjin Institute of Industrial Biotechnology, Chinese Academy of Sciences, Tianjin 300308, China

<sup>3</sup> National Technology Innovation Center of Synthetic Biology, Tianjin 300308, China

\* Correspondence: dzhongtaochina@163.com (Z.D.); cuichs@tib.cas.cn (C.C.); Tel./Fax: +86-22-2482-8742 (C.C.)

## Table of Contents

|                                                                                                                                                       |                                     |
|-------------------------------------------------------------------------------------------------------------------------------------------------------|-------------------------------------|
| 1. Sequence of IR36-M5 .....                                                                                                                          | <b>Error! Bookmark not defined.</b> |
| 2. Table S1. List of primers in this study .....                                                                                                      | 4                                   |
| 3. Table S2. Enantioselectivity of the mutants generated by site-saturation mutagenesis of residue M203 over M5 .....                                 | 4                                   |
| 4. Table S3. Enantioselectivity of the mutants generated by site-saturation mutagenesis of residue F260 over M5 .....                                 | 4                                   |
| 5. Table S4. Enantioselectivity of the mutants generated by site-saturation mutagenesis of residue H264 over M5 .....                                 | 4                                   |
| 6. Table S5. Enantioselectivity of the mutants generated by site-saturation mutagenesis of residue G268 over M5 .....                                 | 5                                   |
| 7. Table S6. Enantioselectivity of the mutants generated by site-saturation mutagenesis of residue L200 over M5 .....                                 | 5                                   |
| 8. Figure S1. Enantioselectivity of IR36-M5 and its mutants at sites L200, respectively .....                                                         | 5                                   |
| 9. Table S7. Enantioselectivity of the mutants generated by site-saturation mutagenesis of residue Y204 over M5 .....                                 | 5                                   |
| 10. Figure S2. Enantioselectivity of IR36-M5 and its mutants at sites Y204, respectively .....                                                        | 6                                   |
| 11. Table S8. Enantioselectivity of the mutants generated by site-saturation mutagenesis of residue W234 over M5 .....                                | 6                                   |
| 12. Figure S3. Enantioselectivity of IR36-M5 and its mutants at sites 234, respectively .....                                                         | 6                                   |
| 13. Table S9. Conversion rates and stereoselectivities of IRED mutants towards <b>1a</b> .....                                                        | 7                                   |
| 14. Figure S4. Chiral HPLC analysis of racemic standard of <b>1a</b> , and chiral amine standards of <b>1a</b> , M5 catalytic product <b>1a</b> ..... | 3                                   |
| 15. Figure S5. The <sup>1</sup> H NMR spectrum of <b>1a</b> in chloroform- <i>d</i> <sub>4</sub> (400 MHz) .....                                      | 9                                   |
| 16. Figure S6. The <sup>13</sup> C NMR spectrum of <b>1a</b> in chloroform- <i>d</i> <sub>4</sub> (100 MHz) .....                                     | 9                                   |
| 17. Figure S7. The <sup>1</sup> H NMR spectrum of <b>Selegiline</b> in chloroform- <i>d</i> <sub>4</sub> (400 MHz) .....                              | 10                                  |
| 18. Figure S8. The <sup>13</sup> C NMR spectrum of <b>Selegiline</b> in chloroform- <i>d</i> <sub>4</sub> (100 MHz) .....                             | <b>Error!</b>                       |

**Bookmark not defined.**

## 1. Sequence of IR36-M5

### *DNA sequence of IR36-M5*

ATGGGCAGCAGCCATCATCATCATCACAGCAGCGGCCTGGTGCCGCGCGGCAGCCATATGCCGGA  
ATCTACCAACCCGAGTACCGCCACCCCGGTGACCATCATCGGTCTTGGTGCAATGGGCACCGCCCTGG  
CAAACGCATTCTCGATGCAGGTCATAGTACCACCGTTTGGAAATCGTACCGCAGCACGCGCCACCGCA  
TTAGCCGCACGCGGCGCACATCATGCAGAAACCGTGACCGAAGCCATTGCAGCCTCTCCGTTAGTGAT  
TGCCTGTGTGCTGGATTATGATGCCTTTCATGAAACCTTAGCCCCGGCTACAGACGCGCTGGCAGGTCTG  
CGCCCTGGTTAATCTGACCACAGGTACCCCGAAACAGGCACGCGAAACCGCCTCTTGGGCAGCCGAT  
CATCGTATTGATTATCTGGATGGCAAAATTATGGCCATTCCGCCGGGTATTGCAACCCCGGATAGTTTTA  
TTCTGTATAGCGGTCCGTTAGGTACCTTTGAAGCACATCGCTCAACCTTAGAAGTGCTGGGCGCAGCA  
AATCATGTGGGTACCGATGCAGGTTTGGCGAGCTTACATGATATTGCACTGCTGACCGGTATGTATGGC  
ATGATTGCAGGCATTTTACAGGCCTTTGCCTTAATTGATAGTGAAGGTATTCCGGCAGGCGATCTGGCC  
CCGATGTTAACCAATTGGTTAACCGGCGCAGCACATAGCGTGGCCCATTATGCCAGCAGATTGATACC  
GGCGATTATGAAACCGGTGTTGTGTTTAATTTAGCACATCAGAGCCATGGCTTTGCAAAATTAGTTCAG  
GCCGGTGAAGATCAGGGTGTGGATGTGGGCTTACTGCGTCCGCTGTTTGAAGTATGCGTCATCAGGT  
TGCCGCAGGCTATGGTAATGGTGATGTTGCCTCAGTTATTGAACTGATTCGTCGCGAAGAACGTCGTCA  
GCCGGCCAAAAGTCCGGGCGCAGATAAAATTACCCGTGCACGTCGTCCGTAA

### *Amino acid sequence of IR36-M5*

MGSSHHHHHSSGLVPRGSHMPESTTPSTATPVTIIGLGAMGTALANAFLDAGHSTTVWNRTAARATALA  
ARGAHHAETVTEAIAASPLVIACVLDYDAFHETLAPATDALAGRALVNLTTGTPKQARETASWAADHRID  
YLDGKIMAIPPGIATPDSFILYSGPLGTFEAHRSTLEVLGAANHVGTDAGLASLHDIALLTGMYGMIAGILQ  
AFALIDSEGIPAGDLAPMLTNWLTGAAHSVAHYAQQIDTGDYETGVVFNLAHQSHGFAKLVQAGEDQGV  
DVGLLRPLFELMRHQVAAGYGNGDVASVIELIRREERRQPAKSPGADKITRARRP\*

**Table S1.** List of primers in this study.

| Primer | mutant  | Sequences (5'→3')                    |
|--------|---------|--------------------------------------|
| F      | L200NNK | ACCGGTTNNKAGTGCAATATCATGTAAGCTCGCCA  |
| R      | L200NNK | TATTGCACTMNNNAACCGGTATGTATGGCATGATTG |
| F      | M203NNK | GCCTGCAATCATGCCATAMNNACCGGTCAGCAGTG  |
| R      | M203NNK | NNKTATGGCATGATTGCAGGCATTTTACAGGCCTT  |
| F      | Y204NNK | AATGCCTGCAATCATGCCMNNCATAACCGGTCAGCA |
| R      | Y204NNK | NNKGGCATGATTGCAGGCATTTTACAGGCCTTTGC  |
| F      | W234NNK | ACCAATNNKTTAACCGGCGCAGCACATAGC       |
| R      | W234NNK | GCCGGTTAAMNNATTGGTTAACATCGGGGC       |
| F      | F260NNK | GTTGTGNNKAATTTAGCACATCAGAG           |
| R      | F260NNK | CTAAATTMNNCACAACACCGGTTTCA           |
| F      | H264NNK | TGCAAAGCCATGGCTCTGMNNTGCTAAATTAAACA  |
| R      | H264NNK | NNKCAGAGCCATGGCTTTGCAAAATTAGTTCAGGC  |
| F      | G268NNK | CTGAACTAATTTTGCAAAMNNATGGCTCTGATGTG  |
| R      | G268NNK | NNKTTTGCAAAATTAGTTCAGGCCGGTGAAGATCA  |

**Table S2.** Enantioselectivity of the mutants generated by site-saturation mutagenesis of residue M203 over M5.

| Mutants | ee value      | Mutants | ee value      | Mutants | ee value      |
|---------|---------------|---------|---------------|---------|---------------|
| M203A   | 92%, <i>R</i> | M203I   | N.D.          | M203S   | 91%, <i>R</i> |
| M203C   | 86%, <i>R</i> | M203K   | 29%, <i>R</i> | M203T   | 70%, <i>R</i> |
| M203D   | N.D.          | M203L   | 96%, <i>R</i> | M203V   | 85%, <i>R</i> |
| M203E   | 98%, <i>R</i> | M203N   | 79%, <i>R</i> | M203W   | 63%, <i>R</i> |
| M203F   | 70%, <i>R</i> | M203P   | 89%, <i>R</i> | M203Y   | 66%, <i>R</i> |
| M203G   | N.D.          | M203Q   | 98%, <i>R</i> |         |               |
| M203H   | 82%, <i>R</i> | M203R   | 97%, <i>R</i> |         |               |

**Table S3.** Enantioselectivity of the mutants generated by site-saturation mutagenesis of residue F260 over M5.

| Mutants | ee value      | Mutants | ee value      | Mutants | ee value      |
|---------|---------------|---------|---------------|---------|---------------|
| F260A   | 85%, <i>R</i> | F260K   | N.D.          | F260S   | 92%, <i>R</i> |
| F260C   | 88%, <i>R</i> | F260L   | 77%, <i>R</i> | F260T   | 87%, <i>R</i> |
| F260D   | 52%, <i>R</i> | F260M   | 98%, <i>R</i> | F260V   | 67%, <i>R</i> |
| F260E   | 76%, <i>R</i> | F260N   | 85%, <i>R</i> | F260W   | 93%, <i>R</i> |
| F260G   | 96%, <i>R</i> | F260P   | 52%, <i>R</i> | F260Y   | 95%, <i>R</i> |
| F260H   | 93%, <i>R</i> | F260Q   | N.D.          |         |               |
| F260I   | 27%, <i>R</i> | F260R   | N.D.          |         |               |

**Table S4.** Enantioselectivity of the mutants generated by site-saturation mutagenesis of residue H264 over M5.

| Mutants | ee value      | Mutants | ee value      | Mutants | ee value      |
|---------|---------------|---------|---------------|---------|---------------|
| H264A   | 96%, <i>R</i> | H264K   | 96%, <i>R</i> | H264S   | 97%, <i>R</i> |
| H264C   | 95%, <i>R</i> | H264L   | 95%, <i>R</i> | H264T   | 92%, <i>R</i> |
| H264D   | 94%, <i>R</i> | H264M   | 96%, <i>R</i> | H264V   | 83%, <i>R</i> |
| H264E   | 96%, <i>R</i> | H264N   | 98%, <i>R</i> | H264W   | 60%, <i>R</i> |
| H264F   | 83%, <i>R</i> | H264P   | 94%, <i>R</i> | H264Y   | 94%, <i>R</i> |
| H264G   | 97%, <i>R</i> | H264Q   | 96%, <i>R</i> |         |               |
| H264I   | 93%, <i>R</i> | H264R   | 94%, <i>R</i> |         |               |

**Table S5.** Enantioselectivity of the mutants generated by site-saturation mutagenesis of residue G268 over M5.

| Mutants | ee value      | Mutants | ee value      | Mutants | ee value      |
|---------|---------------|---------|---------------|---------|---------------|
| G268A   | 86%, <i>R</i> | G268K   | N.D.          | G268S   | 96%, <i>R</i> |
| G268C   | 71%, <i>R</i> | G268L   | 16%, <i>R</i> | G268T   | 44%, <i>R</i> |
| G268D   | 76%, <i>R</i> | G268M   | 92%, <i>R</i> | G268V   | 23%, <i>R</i> |
| G268E   | 92%, <i>R</i> | G268N   | 87%, <i>R</i> | G268W   | 94%, <i>R</i> |
| G268F   | 97%, <i>R</i> | G268P   | 83%, <i>R</i> | G268Y   | 53%, <i>R</i> |
| G268H   | 98%, <i>R</i> | G268Q   | 97%, <i>R</i> |         |               |
| G268I   | 58%, <i>R</i> | G268R   | N.D.          |         |               |

**Table S6.** Enantioselectivity of the mutants generated by site-saturation mutagenesis of residue L200 over M5.

| Mutants | ee value      | Mutants | ee value      | Mutants | ee value      |
|---------|---------------|---------|---------------|---------|---------------|
| L200A   | 57%, <i>R</i> | L200I   | 86%, <i>R</i> | L200S   | 39%, <i>R</i> |
| L200C   | 51%, <i>R</i> | L200K   | N.D.          | L200T   | 35%, <i>R</i> |
| L200D   | 37%, <i>R</i> | L200M   | 95%, <i>R</i> | L200V   | 86%, <i>R</i> |
| L200E   | 41%, <i>R</i> | L200N   | 89%, <i>R</i> | L200W   | N.D.          |
| L200F   | 58%, <i>R</i> | L200P   | N.D.          | L200Y   | N.D.          |
| L200G   | 79%, <i>R</i> | L200Q   | 47%, <i>R</i> |         |               |
| L200H   | N.D.          | L200R   | N.D.          |         |               |

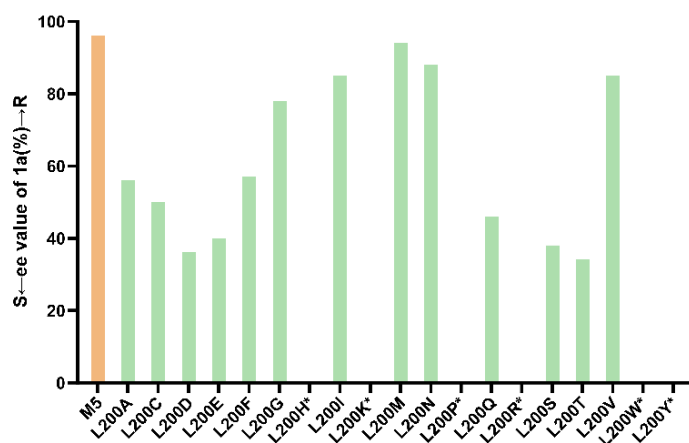**Figure S1.** Enantioselectivity of IR36-M5 and its mutants at sites L200, respectively.**Table S7.** Enantioselectivity of the mutants generated by site-saturation mutagenesis of residue Y204 over M5.

| Mutants | ee value      | Mutants | ee value      | Mutants | ee value      |
|---------|---------------|---------|---------------|---------|---------------|
| Y204A   | 72%, <i>R</i> | Y204I   | 55%, <i>R</i> | Y204R   | N.D.          |
| Y204C   | 62%, <i>R</i> | Y204K   | N.D.          | Y204S   | 72%, <i>R</i> |
| Y204D   | 88%, <i>R</i> | Y204L   | 48%, <i>R</i> | Y204T   | 76%, <i>R</i> |
| Y204E   | 89%, <i>R</i> | Y204M   | 89%, <i>R</i> | Y204V   | 62%, <i>R</i> |
| Y204F   | N.D.          | Y204N   | 94%, <i>R</i> | Y204W   | 94%, <i>R</i> |
| Y204G   | 64%, <i>R</i> | Y204P   | N.D.          |         |               |
| Y204H   | 90%, <i>R</i> | Y204Q   | 88%, <i>R</i> |         |               |

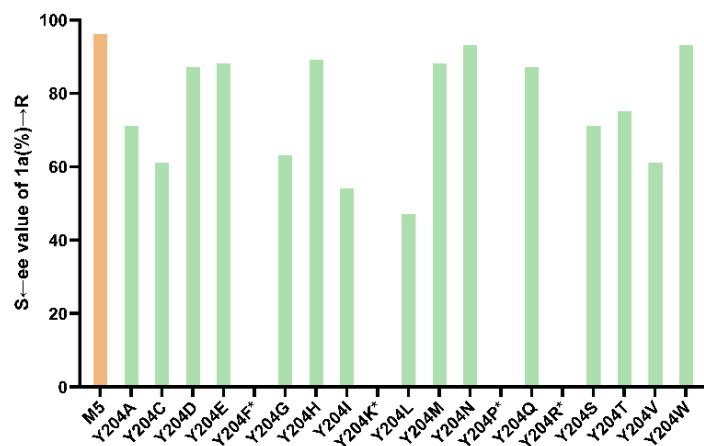

**Figure S2.** Enantioselectivity of IR36-M5 and its mutants at sites Y204, respectively.

**Table S8.** Enantioselectivity of the mutants generated by site-saturation mutagenesis of residue W234 over M5.

| Mutants | ee value      | Mutants | ee value      | Mutants | ee value      |
|---------|---------------|---------|---------------|---------|---------------|
| W234A   | 86%, <i>R</i> | W234I   | 82%, <i>R</i> | W234R   | 95%, <i>R</i> |
| W234C   | 89%, <i>R</i> | W234K   | 86%, <i>R</i> | W234S   | 89%, <i>R</i> |
| W234D   | 88%, <i>R</i> | W234L   | 76%, <i>R</i> | W234T   | 89%, <i>R</i> |
| W234E   | 51%, <i>R</i> | W234M   | 78%, <i>R</i> | W234V   | 92%, <i>R</i> |
| W234F   | 93%, <i>R</i> | W234N   | 85%, <i>R</i> | W234Y   | 96%, <i>R</i> |
| W234G   | 79%, <i>R</i> | W234P   | 92%, <i>R</i> |         |               |
| W234H   | 91%, <i>R</i> | W234Q   | 84%, <i>R</i> |         |               |

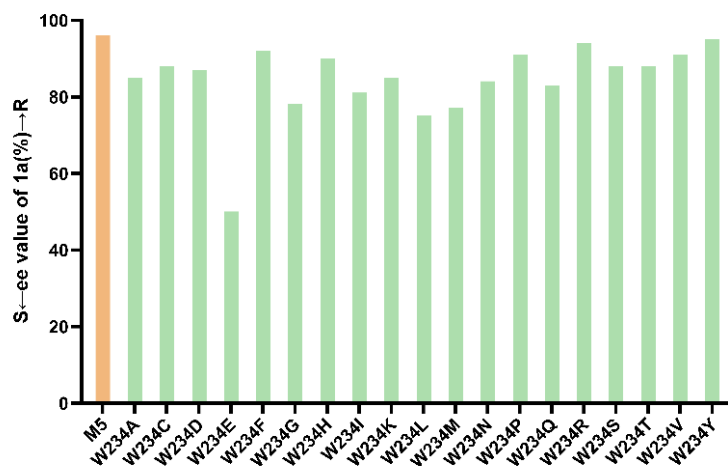

**Figure S3.** Enantioselectivity of IR36-M5 and its mutants at sites 234, respectively.

**Table S9.** Conversion rates and stereoselectivities of IRED mutants towards **1a**.

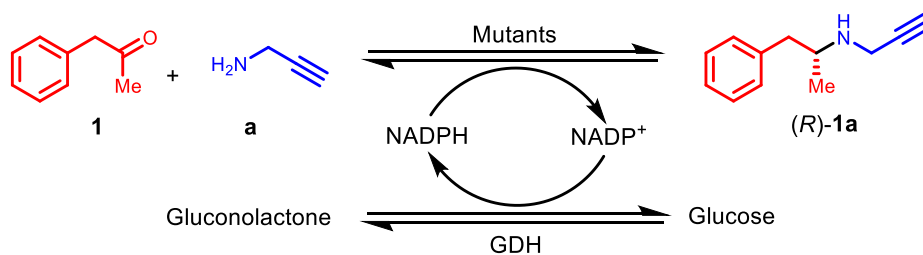

| Entry | Mutants  | Substrate loading (mM) | Enzyme loading (mg mL <sup>-1</sup> ) | Conv.(%) | ee (%)       |
|-------|----------|------------------------|---------------------------------------|----------|--------------|
| 1     | IR36-M5  | 30                     | 10                                    | 97       | 97, <i>R</i> |
| 2     | M5-M203E | 30                     | 10                                    | 34       | 98, <i>R</i> |
| 3     | M5-M203Q | 30                     | 10                                    | 42       | 98, <i>R</i> |
| 4     | M5-F260M | 30                     | 10                                    | 9        | 98, <i>R</i> |
| 5     | M5-H264N | 30                     | 10                                    | 58       | 98, <i>R</i> |
| 6     | M5-G268H | 30                     | 10                                    | 65       | 98, <i>R</i> |

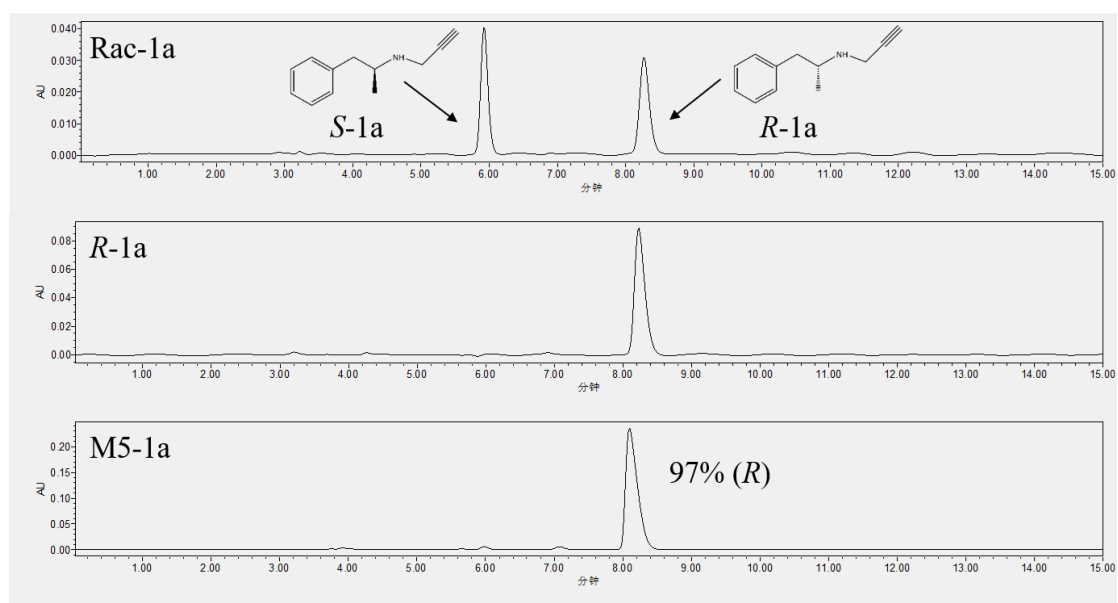

**Figure S4.** Chiral HPLC analysis of racemic standard of **1a**, and chiral amine standards of **1a**, M5 catalytic product **1a**.

HPLC conditions: CHIRALPAK IG column with a mobile phase of *n*-hexane/ethanol (90:10, v/v, 0.2% diethylamine), flow rate 1.0 mL/min, 30 °C, UV detection at 258.4 nm.



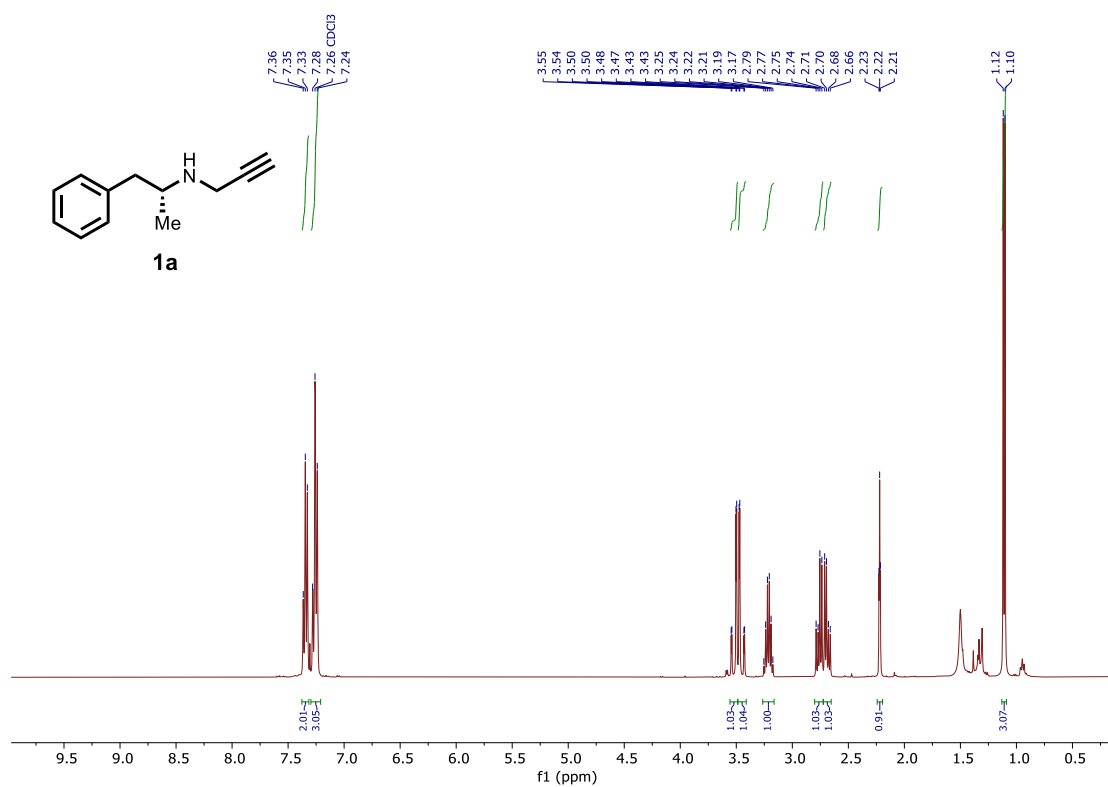

**Figure S5.** The <sup>1</sup>H NMR spectrum of **1a** in chloroform-*d*<sub>4</sub> (400 MHz)

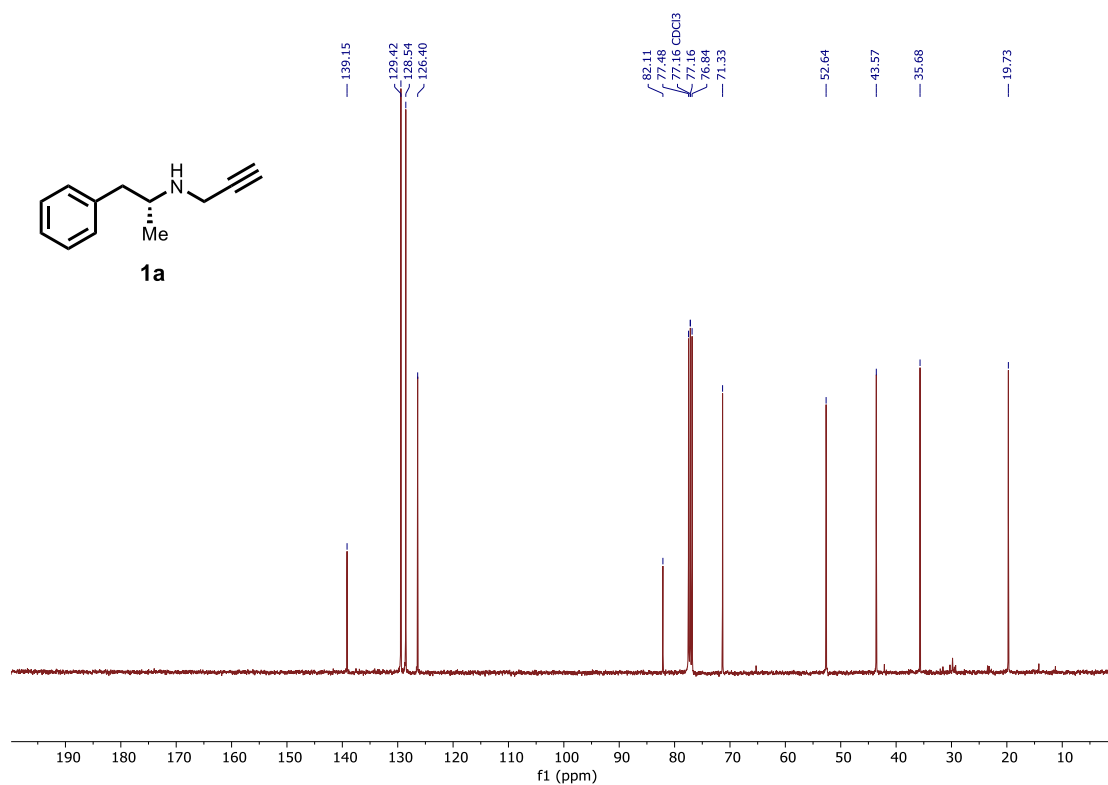

**Figure S6.** The <sup>13</sup>C NMR spectrum of **1a** in chloroform-*d*<sub>4</sub> (100 MHz)

JP-HVL-two-4-5.1.fid

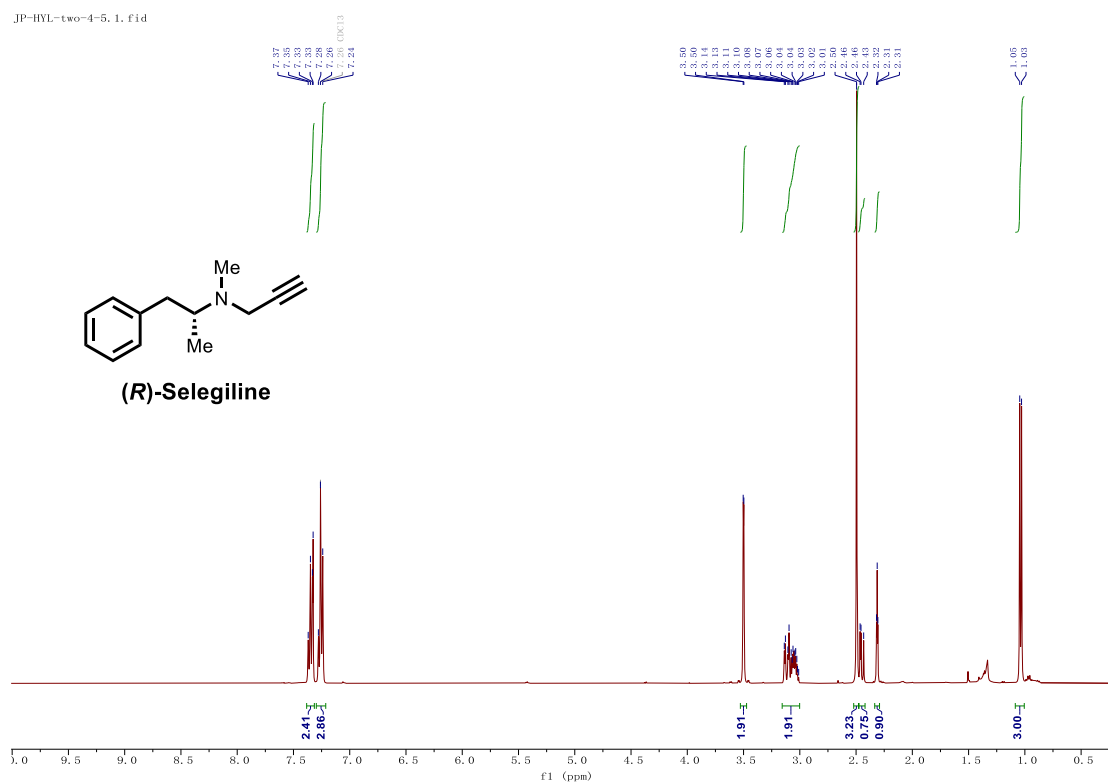

Figure S7. The <sup>1</sup>H NMR spectrum of Selegiline in chloroform-*d*<sub>4</sub> (400 MHz)

JP-HVL-C.1.fid

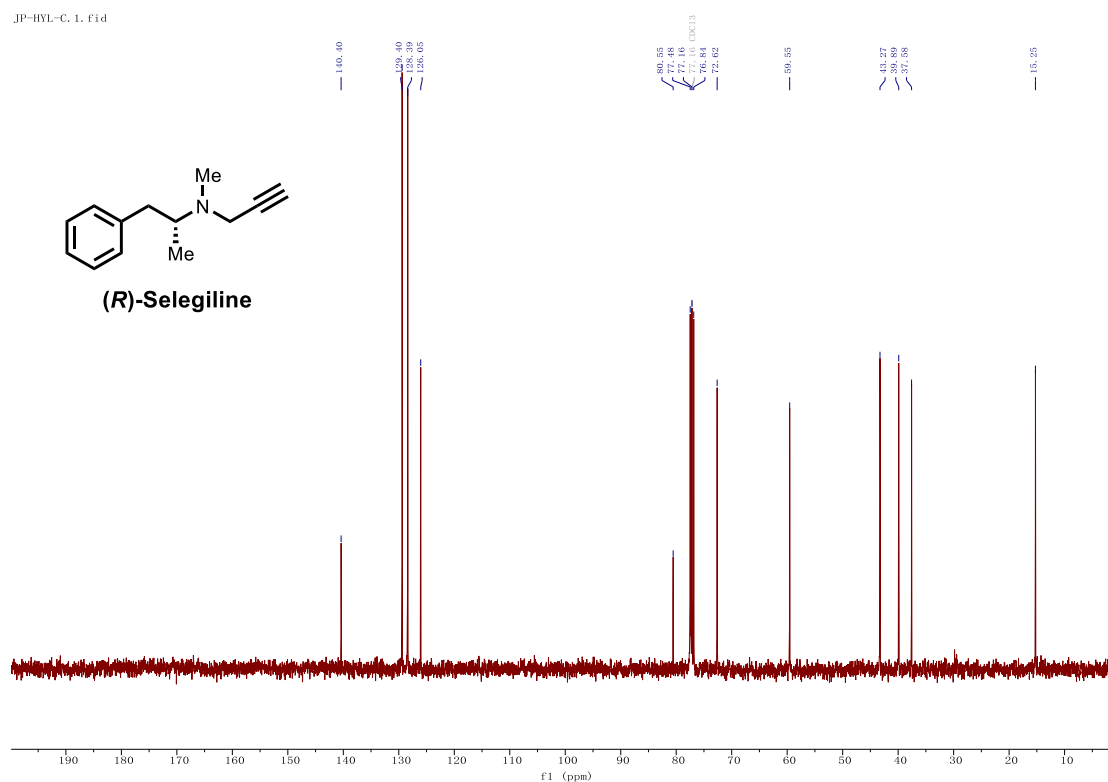

Figure S8. The <sup>13</sup>C NMR spectrum of Selegiline in chloroform-*d*<sub>4</sub> (100 MHz)
